# Supplementary material for: Transcription Factor ATF3 Participates in DeltaNp63-Mediated Proliferation of Corneal Epithelial Cells
Source: MDPI journal article supplement (doi:10.3390/jpm13040700), 2023-04-21
Supplement: s1 [file s1]

## Supplementary data

**Table S1. Primer list for reverse transcriptase PCR**

| Gene                   | Primer sequence                                      | Accession no.  | Product size (bp) |
|------------------------|------------------------------------------------------|----------------|-------------------|
| <i>ATF3</i>            | F: CCTCTGCGCTGGAATCAGTC<br>R: TTCTTTCTCGTCGCCTCTTTTT | NM_001206486.2 | 111               |
| <i>JUN</i>             | F: TCCAAGTGCCGAAAAAGGAAG<br>R: CGAGTTCTGAGCTTTCAAGGT | NM_002228.4    | 78                |
| <i>EGR1</i>            | F: GGTCAAGTGGCCTAGTGAGC<br>R: GTGCCGCTGAGTAAATGGGA   | NM_001964.3    | 149               |
| <i>PAX6</i>            | F: TGGGCAGGTATTACGAGACTG<br>R: ACTCCCGCTTATACTGGGCTA | NM_001604.5    | 111               |
| <i>CEBPB</i>           | F: CTTCAAGCCCGTACCTGGAG<br>R: GGAGAGGAAGTCGTGGTGC    | NM_005194.4    | 136               |
| <i>CCNA1</i>           | F: TTTGGGGTCCAGGCAGGTT<br>R: AGGGTACATGATTGCGGGAAA   | NM_003914.3    | 111               |
| <i>CCNB1</i>           | F: GCAGCAGGAGCTTTTTGCTT<br>R: CCAGGTGCTGCATAACTGGA   | NM_031966.3    | 118               |
| <i>CCND1</i>           | F: GCCGAGAAGCTGTGCATCTA<br>R: GAAATCGTGCGGGGTCATTG   | NM_053056.2    | 120               |
| <i>CCNE1</i>           | F: CAGCCCCATCATGCCGAG<br>R: GGTCACGTTTGCCTTCCTCT     | NM_001238.3    | 118               |
| <i>CDKN1B</i><br>(p27) | F: AGTGTCTAACGGGAGCCCTA<br>R: CCGGGTTAACTCTTCGTGGT   | NM_004064.4    | 115               |
| <i>CDKN1A</i><br>(p21) | F: GCTGCCGAAGTCAGTTCCTT<br>R: GCATGGGTTCTGACGGACAT   | NM_000389.4    | 117               |
